# Supplementary material
Source: Research Square preprint supplement (doi:10.21203/rs.3.rs-9824110/v1)
Supplement: Supplementary file 1 [file 5abdd54c0c726e80fb45b543.xlsx]

## Sheet: Supp_Tab_S1
maSigPro Module 3
Enriched GO ID	Enriched GO Term	Number of annotated genes	Number of significant genes	Number of expected genes	classicFisher
GO:0010312	detoxification of zinc ion	10	9	0.42	3.8e-12
GO:0006270	DNA replication initiation	89	21	3.74	8.9e-11
GO:0033314	mitotic DNA replication checkpoint signaling	22	11	0.92	3.2e-10
GO:0006606	protein import into nucleus	128	27	5.37	7.8e-10
GO:0000724	double-strand break repair via homologous recombination	188	38	7.89	2.4e-09
GO:0000398	mRNA splicing, via spliceosome	474	56	19.9	2.7e-09
GO:0007095	mitotic G2 DNA damage checkpoint signaling	27	11	1.13	4.8e-09
GO:0006357	regulation of transcription by RNA polymerase II	1749	120	73.44	8.3e-08
GO:0000712	resolution of meiotic recombination intermediates	28	10	1.18	1.1e-07
GO:0006287	base-excision repair, gap-filling	8	6	0.34	1.4e-07
GO:0006261	DNA-templated DNA replication	283	53	11.88	2.1e-07
GO:0044208	de novo' AMP biosynthetic process	9	6	0.38	4.1e-07
GO:0006882	intracellular zinc ion homeostasis	33	10	1.39	6.3e-07
GO:0045004	DNA replication proofreading	10	6	0.42	9.8e-07
GO:0006338	chromatin remodeling	777	69	32.63	1.3e-06
GO:0051028	mRNA transport	133	26	5.58	2.4e-06
GO:0000349	generation of catalytic spliceosome for first transesterification step	4	4	0.17	3.1e-06
GO:0000727	double-strand break repair via break-induced replication	31	9	1.3	3.4e-06
GO:0006297	nucleotide-excision repair, DNA gap filling	19	7	0.8	7.3e-06
GO:0097500	receptor localization to non-motile cilium	5	4	0.21	1.5e-05
GO:0070936	protein K48-linked ubiquitination	37	9	1.55	1.7e-05
GO:0006744	ubiquinone biosynthetic process	38	9	1.6	2.1e-05
GO:0006511	ubiquitin-dependent protein catabolic process	686	72	28.81	2.1e-05
GO:0051301	cell division	419	36	17.59	4.5e-05
GO:0006281	DNA repair	1269	132	53.29	4.6e-05
GO:0036297	interstrand cross-link repair	42	9	1.76	5e-05
GO:0016567	protein ubiquitination	870	68	36.53	6.2e-05
GO:0016973	poly(A)+ mRNA export from nucleus	34	8	1.43	6.5e-05
GO:0010197	polar nucleus fusion	3	3	0.13	7.4e-05
GO:0010198	synergid death	3	3	0.13	7.4e-05
GO:0000740	nuclear membrane fusion	3	3	0.13	7.4e-05
GO:0009558	embryo sac cellularization	3	3	0.13	7.4e-05
GO:0071076	RNA 3' uridylation	3	3	0.13	7.4e-05
GO:2000369	regulation of clathrin-dependent endocytosis	3	3	0.13	7.4e-05
GO:0051225	spindle assembly	100	14	4.2	7.5e-05
GO:0048259	regulation of receptor-mediated endocytosis	15	8	0.63	7.9e-05
GO:0071577	zinc ion transmembrane transport	55	10	2.31	8.6e-05
GO:0043153	entrainment of circadian clock by photoperiod	7	4	0.29	9.8e-05
GO:0006368	transcription elongation by RNA polymerase II	92	13	3.86	0.00012
GO:0035329	hippo signaling	35	11	1.47	0.00012
GO:0031573	mitotic intra-S DNA damage checkpoint signaling	20	6	0.84	0.00013
GO:0006189	de novo' IMP biosynthetic process	20	6	0.84	0.00013
GO:0032786	positive regulation of DNA-templated transcription, elongation	39	8	1.64	0.00018
GO:0009263	deoxyribonucleotide biosynthetic process	21	8	0.88	0.00019
GO:0097192	extrinsic apoptotic signaling pathway in absence of ligand	8	4	0.34	0.00019
GO:0046015	regulation of transcription by glucose	8	4	0.34	0.00019
GO:0000183	rDNA heterochromatin formation	8	4	0.34	0.00019
GO:0035330	regulation of hippo signaling	15	5	0.63	0.00027
GO:0046100	hypoxanthine metabolic process	4	3	0.17	0.00029
GO:0032263	GMP salvage	4	3	0.17	0.00029
GO:0106300	protein-DNA covalent cross-linking repair	4	3	0.17	0.00029
GO:0006178	guanine salvage	4	3	0.17	0.00029
GO:0043161	proteasome-mediated ubiquitin-dependent protein catabolic process	431	46	18.1	0.00031
GO:0002943	tRNA dihydrouridine synthesis	9	4	0.38	0.00033
GO:0006607	NLS-bearing protein import into nucleus	9	4	0.38	0.00033
GO:0006750	glutathione biosynthetic process	9	4	0.38	0.00033
GO:0032436	positive regulation of proteasomal ubiquitin-dependent protein catabolic process	39	10	1.64	0.00037
GO:0045892	negative regulation of DNA-templated transcription	484	37	20.32	0.00037
GO:0006611	protein export from nucleus	34	7	1.43	0.00045
GO:0043001	Golgi to plasma membrane protein transport	17	5	0.71	0.00053
GO:0006298	mismatch repair	57	9	2.39	0.00058
GO:0015012	heparan sulfate proteoglycan biosynthetic process	26	6	1.09	0.00061
GO:1902969	mitotic DNA replication	37	7	1.55	0.00077
GO:1902966	positive regulation of protein localization to early endosome	11	4	0.46	0.00081
GO:0006999	nuclear pore organization	11	4	0.46	0.00081
GO:2000643	positive regulation of early endosome to late endosome transport	11	4	0.46	0.00081
GO:0007131	reciprocal meiotic recombination	77	18	3.23	0.00088
GO:0031145	anaphase-promoting complex-dependent catabolic process	35	9	1.47	0.00111
GO:0000165	MAPK cascade	190	18	7.98	0.00114
GO:0042256	cytosolic ribosome assembly	12	4	0.5	0.00117
GO:0042780	tRNA 3'-end processing	12	4	0.5	0.00117
GO:0006346	DNA methylation-dependent constitutive heterochromatin formation	20	5	0.84	0.00118
GO:0045003	double-strand break repair via synthesis-dependent strand annealing	20	5	0.84	0.00118
GO:0000082	G1/S transition of mitotic cell cycle	40	9	1.68	0.00134
GO:0000973	post-transcriptional tethering of RNA polymerase II gene DNA at nuclear periphery	6	3	0.25	0.00134
GO:1905786	positive regulation of anaphase-promoting complex-dependent catabolic process	6	3	0.25	0.00134
GO:0045747	positive regulation of Notch signaling pathway	6	3	0.25	0.00134
GO:0000266	mitochondrial fission	21	5	0.88	0.0015
GO:0032924	activin receptor signaling pathway	13	4	0.55	0.00163
GO:0046040	IMP metabolic process	30	11	1.26	0.00174
GO:0022027	interkinetic nuclear migration	2	2	0.08	0.00176
GO:0097510	base-excision repair, AP site formation via deaminated base removal	2	2	0.08	0.00176
GO:0036071	N-glycan fucosylation	2	2	0.08	0.00176
GO:0016925	protein sumoylation	32	6	1.34	0.00192
GO:0006974	DNA damage response	1432	161	60.13	0.00194
GO:0090263	positive regulation of canonical Wnt signaling pathway	43	7	1.81	0.00194
GO:0031123	RNA 3'-end processing	153	21	6.42	0.00197
GO:1901987	regulation of cell cycle phase transition	263	43	11.04	0.00208
GO:0070536	protein K63-linked deubiquitination	14	4	0.59	0.00221
GO:0006406	mRNA export from nucleus	103	17	4.32	0.00225
GO:0006657	CDP-choline pathway	7	3	0.29	0.00228
GO:0034398	telomere tethering at nuclear periphery	7	3	0.29	0.00228
GO:0009221	pyrimidine deoxyribonucleotide biosynthetic process	7	3	0.29	0.00228
GO:0007346	regulation of mitotic cell cycle	258	39	10.83	0.00304
GO:0032264	IMP salvage	8	3	0.34	0.00353
GO:0070131	positive regulation of mitochondrial translation	8	3	0.34	0.00353
GO:0001732	formation of cytoplasmic translation initiation complex	36	6	1.51	0.00358
GO:0042149	cellular response to glucose starvation	16	4	0.67	0.00376
GO:0000077	DNA damage checkpoint signaling	97	24	4.07	0.00491
GO:0009211	pyrimidine deoxyribonucleoside triphosphate metabolic process	9	3	0.38	0.00513
GO:0000390	spliceosomal complex disassembly	9	3	0.38	0.00513
GO:0009052	pentose-phosphate shunt, non-oxidative branch	3	2	0.13	0.00514
GO:0044210	de novo' CTP biosynthetic process	3	2	0.13	0.00514
GO:0007091	metaphase/anaphase transition of mitotic cell cycle	78	9	3.28	0.00535
GO:0008380	RNA splicing	600	68	25.19	0.00556
GO:0060070	canonical Wnt signaling pathway	182	20	7.64	0.00565
GO:0050650	chondroitin sulfate proteoglycan biosynthetic process	18	4	0.76	0.00591
GO:0006308	DNA catabolic process	29	5	1.22	0.00664
GO:2000134	negative regulation of G1/S transition of mitotic cell cycle	10	3	0.42	0.0071
GO:0006541	glutamine metabolic process	54	7	2.27	0.00716
GO:1905515	non-motile cilium assembly	54	7	2.27	0.00716
GO:0045893	positive regulation of DNA-templated transcription	697	49	29.27	0.00763
GO:0016579	protein deubiquitination	191	19	8.02	0.00775
GO:0006986	response to unfolded protein	70	8	2.94	0.00891
GO:0008285	negative regulation of cell population proliferation	85	9	3.57	0.00932
GO:0090618	DNA clamp unloading	11	3	0.46	0.00946
GO:0046084	adenine biosynthetic process	4	2	0.17	0.00999
GO:0035965	cardiolipin acyl-chain remodeling	4	2	0.17	0.00999
GO:1903724	positive regulation of centriole elongation	4	2	0.17	0.00999
GO:0006014	D-ribose metabolic process	4	2	0.17	0.00999
GO:0060828	regulation of canonical Wnt signaling pathway	101	14	4.24	0.01032
GO:0036211	protein modification process	1737	131	72.94	0.01055
GO:0007265	Ras protein signal transduction	87	9	3.65	0.01079
GO:0006260	DNA replication	492	69	20.66	0.01193
GO:0090646	mitochondrial tRNA processing	12	3	0.5	0.01222
GO:0008608	attachment of spindle microtubules to kinetochore	22	4	0.92	0.01236
GO:0032259	methylation	500	32	21	0.01265
GO:0045944	positive regulation of transcription by RNA polymerase II	462	30	19.4	0.01281
GO:0014013	regulation of gliogenesis	34	5	1.43	0.01309
GO:0032922	circadian regulation of gene expression	23	4	0.97	0.01447
GO:0044774	mitotic DNA integrity checkpoint signaling	67	22	2.81	0.0149
GO:0006382	adenosine to inosine editing	13	3	0.55	0.0154
GO:0006335	DNA replication-dependent chromatin assembly	13	3	0.55	0.0154
GO:0016553	base conversion or substitution editing	13	3	0.55	0.0154
GO:0000280	nuclear division	325	36	13.65	0.01602
GO:1902977	mitotic DNA replication preinitiation complex assembly	5	2	0.21	0.01619
GO:0033477	S-methylmethionine metabolic process	5	2	0.21	0.01619
GO:0046078	dUMP metabolic process	5	2	0.21	0.01619
GO:0031508	pericentric heterochromatin formation	5	2	0.21	0.01619
GO:0140647	P450-containing electron transport chain	5	2	0.21	0.01619
GO:1990180	mitochondrial tRNA 3'-end processing	5	2	0.21	0.01619
GO:2000001	regulation of DNA damage checkpoint	5	2	0.21	0.01619
GO:0044821	meiotic telomere tethering at nuclear periphery	5	2	0.21	0.01619
GO:0070197	meiotic attachment of telomere to nuclear envelope	5	2	0.21	0.01619
GO:0061355	Wnt protein secretion	5	2	0.21	0.01619
GO:0031106	septin ring organization	5	2	0.21	0.01619
GO:0006226	dUMP biosynthetic process	5	2	0.21	0.01619
GO:0009176	pyrimidine deoxyribonucleoside monophosphate metabolic process	5	2	0.21	0.01619
GO:0009177	pyrimidine deoxyribonucleoside monophosphate biosynthetic process	5	2	0.21	0.01619
GO:0033528	S-methylmethionine cycle	5	2	0.21	0.01619
GO:0009139	pyrimidine nucleoside diphosphate biosynthetic process	5	2	0.21	0.01619
GO:0031297	replication fork processing	49	6	2.06	0.01623
GO:0046112	nucleobase biosynthetic process	32	9	1.34	0.01661
GO:0051123	RNA polymerase II preinitiation complex assembly	24	4	1.01	0.0168
GO:0006289	nucleotide-excision repair	83	14	3.49	0.01715
GO:0044773	mitotic DNA damage checkpoint signaling	60	20	2.52	0.01845
GO:0045814	negative regulation of gene expression, epigenetic	124	18	5.21	0.01895
GO:0044771	meiotic cell cycle phase transition	14	3	0.59	0.019
GO:0038203	TORC2 signaling	14	3	0.59	0.019
GO:1901993	regulation of meiotic cell cycle phase transition	14	3	0.59	0.019
GO:0045005	DNA-templated DNA replication maintenance of fidelity	61	12	2.56	0.01914
GO:0090068	positive regulation of cell cycle process	116	12	4.87	0.01941
GO:0048285	organelle fission	354	41	14.86	0.02078
GO:1901990	regulation of mitotic cell cycle phase transition	178	27	7.47	0.02197
GO:0032968	positive regulation of transcription elongation by RNA polymerase II	26	4	1.09	0.02213
GO:0046513	ceramide biosynthetic process	39	5	1.64	0.02283
GO:0032042	mitochondrial DNA metabolic process	15	3	0.63	0.02302
GO:0006264	mitochondrial DNA replication	15	3	0.63	0.02302
GO:0090090	negative regulation of canonical Wnt signaling pathway	53	6	2.23	0.02316
GO:0007039	protein catabolic process in the vacuole	6	2	0.25	0.02361
GO:0030206	chondroitin sulfate biosynthetic process	6	2	0.25	0.02361
GO:0071163	DNA replication preinitiation complex assembly	6	2	0.25	0.02361
GO:0090220	chromosome localization to nuclear envelope involved in homologous chromosome segregation	6	2	0.25	0.02361
GO:0045141	meiotic telomere clustering	6	2	0.25	0.02361
GO:0046686	response to cadmium ion	6	2	0.25	0.02361
GO:0000959	mitochondrial RNA metabolic process	40	5	1.68	0.02521
GO:0006352	DNA-templated transcription initiation	168	13	7.05	0.02529
GO:0045930	negative regulation of mitotic cell cycle	134	29	5.63	0.02555
GO:0006302	double-strand break repair	361	51	15.16	0.02663
GO:0032434	regulation of proteasomal ubiquitin-dependent protein catabolic process	55	13	2.31	0.02704
GO:1902975	mitotic DNA replication initiation	16	3	0.67	0.02747
GO:0021987	cerebral cortex development	16	3	0.67	0.02747
GO:1902315	nuclear cell cycle DNA replication initiation	16	3	0.67	0.02747
GO:0006272	leading strand elongation	16	3	0.67	0.02747
GO:1902292	cell cycle DNA replication initiation	16	3	0.67	0.02747
GO:0043269	regulation of monoatomic ion transport	41	5	1.72	0.02775
GO:0006325	chromatin organization	934	81	39.22	0.02786
GO:0006397	mRNA processing	725	73	30.44	0.02958
GO:0007276	gamete generation	172	13	7.22	0.02988
GO:0008630	intrinsic apoptotic signaling pathway in response to DNA damage	29	4	1.22	0.03186
GO:0061780	mitotic cohesin loading	7	2	0.29	0.03214
GO:0030204	chondroitin sulfate metabolic process	7	2	0.29	0.03214
GO:0046080	dUTP metabolic process	7	2	0.29	0.03214
GO:0046081	dUTP catabolic process	7	2	0.29	0.03214
GO:0090140	regulation of mitochondrial fission	7	2	0.29	0.03214
GO:0009138	pyrimidine nucleoside diphosphate metabolic process	7	2	0.29	0.03214
GO:0032185	septin cytoskeleton organization	7	2	0.29	0.03214
GO:0021543	pallium development	17	3	0.71	0.03234
GO:0006486	protein glycosylation	401	25	16.84	0.03302
GO:0043413	macromolecule glycosylation	401	25	16.84	0.03302
GO:0031146	SCF-dependent proteasomal ubiquitin-dependent protein catabolic process	73	7	3.07	0.0334
GO:0040029	epigenetic regulation of gene expression	169	20	7.1	0.03449
GO:0065004	protein-DNA complex assembly	176	13	7.39	0.03505
GO:0097193	intrinsic apoptotic signaling pathway	44	5	1.85	0.03633
GO:0000387	spliceosomal snRNP assembly	44	5	1.85	0.03633
GO:0006269	DNA replication, synthesis of primer	18	3	0.76	0.03762
GO:0031122	cytoplasmic microtubule organization	75	7	3.15	0.0379
GO:1902749	regulation of cell cycle G2/M phase transition	96	19	4.03	0.03823
GO:0019953	sexual reproduction	430	40	18.06	0.0394
GO:0022616	DNA strand elongation	45	5	1.89	0.03951
GO:0006271	DNA strand elongation involved in DNA replication	45	5	1.89	0.03951
GO:1902115	regulation of organelle assembly	80	9	3.36	0.04005
GO:0045787	positive regulation of cell cycle	131	12	5.5	0.04131
GO:0009213	pyrimidine deoxyribonucleoside triphosphate catabolic process	8	2	0.34	0.04168
GO:0016926	protein desumoylation	8	2	0.34	0.04168
GO:0000965	mitochondrial RNA 3'-end processing	8	2	0.34	0.04168
GO:0000912	assembly of actomyosin apparatus involved in cytokinesis	8	2	0.34	0.04168
GO:0000915	actomyosin contractile ring assembly	8	2	0.34	0.04168
GO:0000012	single strand break repair	8	2	0.34	0.04168
GO:0042407	cristae formation	8	2	0.34	0.04168
GO:0048268	clathrin coat assembly	8	2	0.34	0.04168
GO:0009149	pyrimidine nucleoside triphosphate catabolic process	8	2	0.34	0.04168
GO:0034087	establishment of mitotic sister chromatid cohesion	8	2	0.34	0.04168
GO:0044784	metaphase/anaphase transition of cell cycle	79	10	3.32	0.04181
GO:0033045	regulation of sister chromatid segregation	79	10	3.32	0.04181
GO:0009212	pyrimidine deoxyribonucleoside triphosphate biosynthetic process	1	1	0.04	0.04199
GO:0014029	neural crest formation	1	1	0.04	0.04199
GO:0051685	maintenance of ER location	1	1	0.04	0.04199
GO:1905166	negative regulation of lysosomal protein catabolic process	1	1	0.04	0.04199
GO:0000719	photoreactive repair	1	1	0.04	0.04199
GO:0018342	protein prenylation	1	1	0.04	0.04199
GO:0018343	protein farnesylation	1	1	0.04	0.04199
GO:1905132	regulation of meiotic chromosome separation	1	1	0.04	0.04199
GO:1905133	negative regulation of meiotic chromosome separation	1	1	0.04	0.04199
GO:1904351	negative regulation of protein catabolic process in the vacuole	1	1	0.04	0.04199
GO:0046077	dUDP metabolic process	1	1	0.04	0.04199
GO:0044785	metaphase/anaphase transition of meiotic cell cycle	1	1	0.04	0.04199
GO:0090149	mitochondrial membrane fission	1	1	0.04	0.04199
GO:0010928	regulation of auxin mediated signaling pathway	1	1	0.04	0.04199
GO:0010930	negative regulation of auxin mediated signaling pathway	1	1	0.04	0.04199
GO:0010792	DNA double-strand break processing involved in repair via single-strand annealing	1	1	0.04	0.04199
GO:0009626	plant-type hypersensitive response	1	1	0.04	0.04199
GO:0000389	mRNA 3'-splice site recognition	1	1	0.04	0.04199
GO:0010874	regulation of cholesterol efflux	1	1	0.04	0.04199
GO:0032371	regulation of sterol transport	1	1	0.04	0.04199
GO:0032374	regulation of cholesterol transport	1	1	0.04	0.04199
GO:0071888	macrophage apoptotic process	1	1	0.04	0.04199
GO:0030321	transepithelial chloride transport	1	1	0.04	0.04199
GO:0006227	dUDP biosynthetic process	1	1	0.04	0.04199
GO:0006925	inflammatory cell apoptotic process	1	1	0.04	0.04199
GO:0006235	dTTP biosynthetic process	1	1	0.04	0.04199
GO:0098911	regulation of ventricular cardiac muscle cell action potential	1	1	0.04	0.04199
GO:0035589	G protein-coupled purinergic nucleotide receptor signaling pathway	1	1	0.04	0.04199
GO:0086069	bundle of His cell to Purkinje myocyte communication	1	1	0.04	0.04199
GO:0034050	symbiont-induced defense-related programmed cell death	1	1	0.04	0.04199
GO:0086073	bundle of His cell-Purkinje myocyte adhesion involved in cell communication	1	1	0.04	0.04199
GO:0086042	cardiac muscle cell-cardiac muscle cell adhesion	1	1	0.04	0.04199
GO:1990535	neuron projection maintenance	1	1	0.04	0.04199
GO:0048011	neurotrophin TRK receptor signaling pathway	1	1	0.04	0.04199
GO:1902102	regulation of metaphase/anaphase transition of meiotic cell cycle	1	1	0.04	0.04199
GO:1902103	negative regulation of metaphase/anaphase transition of meiotic cell cycle	1	1	0.04	0.04199
GO:0007064	mitotic sister chromatid cohesion	46	5	1.93	0.04285
GO:0022402	cell cycle process	1059	116	44.47	0.04294
GO:0006166	purine ribonucleoside salvage	19	3	0.8	0.04332
GO:0006367	transcription initiation at RNA polymerase II promoter	111	9	4.66	0.04419
GO:1905818	regulation of chromosome separation	62	6	2.6	0.04535
GO:0031327	negative regulation of cellular biosynthetic process	1116	80	46.86	0.0459
GO:0007093	mitotic cell cycle checkpoint signaling	117	25	4.91	0.04608
GO:0044839	cell cycle G2/M phase transition	99	19	4.16	0.04681
GO:0009890	negative regulation of biosynthetic process	1118	80	46.94	0.04765
GO:0071824	protein-DNA complex organization	203	14	8.52	0.04802
GO:0007020	microtubule nucleation	33	4	1.39	0.04818
GO:0007007	inner mitochondrial membrane organization	33	4	1.39	0.04818
GO:1990573	potassium ion import across plasma membrane	33	4	1.39	0.04818
GO:0090307	mitotic spindle assembly	63	6	2.65	0.04842
GO:1902099	regulation of metaphase/anaphase transition of cell cycle	63	6	2.65	0.04842
GO:0051303	establishment of chromosome localization	63	6	2.65	0.04842
GO:0048609	multicellular organismal reproductive process	185	13	7.77	0.04895
GO:0000963	mitochondrial RNA processing	20	3	0.84	0.04942
GO:0019856	pyrimidine nucleobase biosynthetic process	20	3	0.84	0.04942
GO:0000278	mitotic cell cycle	771	79	32.37	0.04947
GO:0140014	mitotic nuclear division	204	14	8.57	0.04966
maSigPro Module 4
Enriched GO ID	Enriched GO Term	Number of annotated genes	Number of significant genes	Number of expected genes	classicFisher
GO:0061817	endoplasmic reticulum-plasma membrane tethering	13	7	0.44	7.3e-08
GO:0042554	superoxide anion generation	17	7	0.58	7.3e-07
GO:0140285	endosome fission	4	4	0.14	1.3e-06
GO:0051610	serotonin uptake	8	5	0.27	2.3e-06
GO:0046847	filopodium assembly	20	7	0.68	2.7e-06
GO:0006011	UDP-glucose metabolic process	13	7	0.44	5e-06
GO:0008277	regulation of G protein-coupled receptor signaling pathway	22	7	0.75	5.5e-06
GO:0006002	fructose 6-phosphate metabolic process	15	6	0.51	5.8e-06
GO:0051664	nuclear pore localization	6	4	0.2	1.9e-05
GO:0043418	homocysteine catabolic process	3	3	0.1	3.9e-05
GO:0051601	exocyst localization	3	3	0.1	3.9e-05
GO:0006048	UDP-N-acetylglucosamine biosynthetic process	13	5	0.44	4.6e-05
GO:0007032	endosome organization	24	6	0.81	0.00012
GO:0034461	uropod retraction	4	3	0.14	0.00015
GO:0006930	substrate-dependent cell migration, cell extension	4	3	0.14	0.00015
GO:0006101	citrate metabolic process	4	3	0.14	0.00015
GO:0033298	contractile vacuole organization	4	3	0.14	0.00015
GO:0033275	actin-myosin filament sliding	4	3	0.14	0.00015
GO:0060328	cytoplasmic actin-based contraction involved in forward cell motility	4	3	0.14	0.00015
GO:0031270	pseudopodium retraction	4	3	0.14	0.00015
GO:0015842	aminergic neurotransmitter loading into synaptic vesicle	4	3	0.14	0.00015
GO:0035725	sodium ion transmembrane transport	200	18	6.78	0.00017
GO:0006487	protein N-linked glycosylation	107	12	3.63	0.00028
GO:0042752	regulation of circadian rhythm	28	6	0.95	0.0003
GO:0090435	protein localization to nuclear envelope	11	4	0.37	0.00036
GO:0006689	ganglioside catabolic process	11	4	0.37	0.00036
GO:2000643	positive regulation of early endosome to late endosome transport	11	4	0.37	0.00036
GO:1902966	positive regulation of protein localization to early endosome	11	4	0.37	0.00036
GO:0007015	actin filament organization	423	36	14.35	0.00036
GO:0006047	UDP-N-acetylglucosamine metabolic process	18	8	0.61	0.00037
GO:0006971	hypotonic response	5	3	0.17	0.00037
GO:0006218	uridine catabolic process	5	3	0.17	0.00037
GO:1900027	regulation of ruffle assembly	5	3	0.17	0.00037
GO:0061669	spontaneous neurotransmitter secretion	5	3	0.17	0.00037
GO:0032060	bleb assembly	5	3	0.17	0.00037
GO:0034220	monoatomic ion transmembrane transport	1400	83	47.49	0.00038
GO:0032956	regulation of actin cytoskeleton organization	231	23	7.84	0.00058
GO:0033514	L-lysine catabolic process to acetyl-CoA via L-pipecolate	6	3	0.2	0.00072
GO:0031034	myosin filament assembly	6	3	0.2	0.00072
GO:0019695	choline metabolic process	6	3	0.2	0.00072
GO:0006801	superoxide metabolic process	50	13	1.7	0.00074
GO:0097320	plasma membrane tubulation	13	4	0.44	0.00074
GO:0008360	regulation of cell shape	103	11	3.49	0.00075
GO:0000281	mitotic cytokinesis	104	11	3.53	0.00082
GO:0072583	clathrin-dependent endocytosis	34	6	1.15	0.0009
GO:0061077	chaperone-mediated protein folding	61	8	2.07	0.00102
GO:0006099	tricarboxylic acid cycle	76	9	2.58	0.00107
GO:0097054	L-glutamate biosynthetic process	2	2	0.07	0.00115
GO:0006747	FAD biosynthetic process	2	2	0.07	0.00115
GO:1902475	L-alpha-amino acid transmembrane transport	77	9	2.61	0.00118
GO:0035235	ionotropic glutamate receptor signaling pathway	7	3	0.24	0.00123
GO:0031154	culmination involved in sorocarp development	7	3	0.24	0.00123
GO:2001046	positive regulation of integrin-mediated signaling pathway	7	3	0.24	0.00123
GO:0007218	neuropeptide signaling pathway	110	11	3.73	0.0013
GO:0030837	negative regulation of actin filament polymerization	81	9	2.75	0.00169
GO:0006886	intracellular protein transport	673	38	22.83	0.00169
GO:0031152	aggregation involved in sorocarp development	8	3	0.27	0.00192
GO:1900026	positive regulation of substrate adhesion-dependent cell spreading	8	3	0.27	0.00192
GO:0019284	L-methionine salvage from S-adenosylmethionine	8	3	0.27	0.00192
GO:0010906	regulation of glucose metabolic process	17	4	0.58	0.0022
GO:0006541	glutamine metabolic process	54	7	1.83	0.00224
GO:0042886	amide transport	118	11	4	0.00229
GO:0071277	cellular response to calcium ion	29	5	0.98	0.00268
GO:1990845	adaptive thermogenesis	18	4	0.61	0.00275
GO:0030042	actin filament depolymerization	56	7	1.9	0.00276
GO:1903013	response to differentiation-inducing factor 1	9	3	0.31	0.00281
GO:0030388	fructose 1,6-bisphosphate metabolic process	9	3	0.31	0.00281
GO:0045214	sarcomere organization	72	8	2.44	0.003
GO:0005975	carbohydrate metabolic process	1074	57	36.43	0.00304
GO:0036065	fucosylation	57	7	1.93	0.00306
GO:0006032	chitin catabolic process	30	5	1.02	0.00313
GO:0006182	cGMP biosynthetic process	73	8	2.48	0.00327
GO:0043063	intercellular bridge organization	3	2	0.1	0.00337
GO:1990074	polyuridylation-dependent mRNA catabolic process	3	2	0.1	0.00337
GO:0030497	fatty acid elongation	19	4	0.64	0.0034
GO:0006865	amino acid transport	186	19	6.31	0.00383
GO:0051046	regulation of secretion	132	13	4.48	0.00385
GO:1903078	positive regulation of protein localization to plasma membrane	10	3	0.34	0.00391
GO:0000916	actomyosin contractile ring contraction	10	3	0.34	0.00391
GO:0042542	response to hydrogen peroxide	32	5	1.09	0.00418
GO:0007229	integrin-mediated signaling pathway	54	9	1.83	0.00487
GO:0016601	Rac protein signal transduction	11	3	0.37	0.00524
GO:0019509	obsolete L-methionine salvage from methylthioadenosine	11	3	0.37	0.00524
GO:0006486	protein glycosylation	401	31	13.6	0.00541
GO:0006810	transport	6123	299	207.71	0.00558
GO:0009154	purine ribonucleotide catabolic process	80	8	2.71	0.00574
GO:0051017	actin filament bundle assembly	49	6	1.66	0.00606
GO:0097359	UDP-glucosylation	4	2	0.14	0.00659
GO:0014889	muscle atrophy	4	2	0.14	0.00659
GO:0016202	regulation of striated muscle tissue development	12	3	0.41	0.00681
GO:0009125	nucleoside monophosphate catabolic process	12	3	0.41	0.00681
GO:0006998	nuclear envelope organization	23	4	0.78	0.00697
GO:0033627	cell adhesion mediated by integrin	36	5	1.22	0.00701
GO:0055085	transmembrane transport	2957	156	100.31	0.00725
GO:0006612	protein targeting to membrane	84	8	2.85	0.00767
GO:0060627	regulation of vesicle-mediated transport	150	15	5.09	0.00773
GO:0060079	excitatory postsynaptic potential	218	15	7.4	0.00779
GO:0051591	response to cAMP	13	3	0.44	0.00863
GO:1903530	regulation of secretion by cell	122	10	4.14	0.00874
GO:0030203	glycosaminoglycan metabolic process	122	10	4.14	0.00874
GO:0044781	bacterial-type flagellum organization	25	4	0.85	0.00944
GO:0097553	calcium ion transmembrane import into cytosol	70	7	2.37	0.00951
GO:0060537	muscle tissue development	118	12	4	0.00993
GO:0017157	regulation of exocytosis	55	6	1.87	0.01059
GO:0097052	L-kynurenine metabolic process	14	3	0.47	0.01071
GO:1901334	lactone metabolic process	14	3	0.47	0.01071
GO:1901336	lactone biosynthetic process	14	3	0.47	0.01071
GO:0030038	contractile actin filament bundle assembly	14	3	0.47	0.01071
GO:0016482	cytosolic transport	89	8	3.02	0.01074
GO:0090160	Golgi to lysosome transport	5	2	0.17	0.01074
GO:0006600	creatine metabolic process	5	2	0.17	0.01074
GO:0006601	creatine biosynthetic process	5	2	0.17	0.01074
GO:0010587	miRNA catabolic process	5	2	0.17	0.01074
GO:0034113	heterotypic cell-cell adhesion	5	2	0.17	0.01074
GO:0150077	regulation of neuroinflammatory response	5	2	0.17	0.01074
GO:0150079	negative regulation of neuroinflammatory response	5	2	0.17	0.01074
GO:0006121	mitochondrial electron transport, succinate to ubiquinone	5	2	0.17	0.01074
GO:0070484	obsolete dehydro-D-arabinono-1,4-lactone metabolic process	5	2	0.17	0.01074
GO:0070485	dehydro-D-arabinono-1,4-lactone biosynthetic process	5	2	0.17	0.01074
GO:0098656	monoatomic anion transmembrane transport	149	11	5.05	0.01293
GO:0098660	inorganic ion transmembrane transport	968	58	32.84	0.01387
GO:0034625	fatty acid elongation, monounsaturated fatty acid	6	2	0.2	0.01575
GO:0034626	fatty acid elongation, polyunsaturated fatty acid	6	2	0.2	0.01575
GO:0010586	miRNA metabolic process	6	2	0.2	0.01575
GO:0006196	AMP catabolic process	6	2	0.2	0.01575
GO:0051031	tRNA transport	6	2	0.2	0.01575
GO:0072089	stem cell proliferation	6	2	0.2	0.01575
GO:0009169	purine ribonucleoside monophosphate catabolic process	6	2	0.2	0.01575
GO:0009158	ribonucleoside monophosphate catabolic process	6	2	0.2	0.01575
GO:0009128	purine nucleoside monophosphate catabolic process	6	2	0.2	0.01575
GO:0060914	heart formation	6	2	0.2	0.01575
GO:0045216	cell-cell junction organization	60	6	2.04	0.01587
GO:0110053	regulation of actin filament organization	179	17	6.07	0.01784
GO:0045010	actin nucleation	62	6	2.1	0.01842
GO:0015671	oxygen transport	17	3	0.58	0.01855
GO:0006102	isocitrate metabolic process	17	3	0.58	0.01855
GO:1902476	chloride transmembrane transport	118	9	4	0.01923
GO:0003012	muscle system process	67	8	2.27	0.01965
GO:0046032	ADP catabolic process	63	6	2.14	0.01979
GO:0009181	purine ribonucleoside diphosphate catabolic process	63	6	2.14	0.01979
GO:0009137	purine nucleoside diphosphate catabolic process	63	6	2.14	0.01979
GO:0006096	glycolytic process	63	6	2.14	0.01979
GO:0090257	regulation of muscle system process	31	4	1.05	0.02
GO:0030212	hyaluronan metabolic process	31	4	1.05	0.02
GO:0006090	pyruvate metabolic process	100	8	3.39	0.02052
GO:0006898	receptor-mediated endocytosis	174	16	5.9	0.02069
GO:0051693	actin filament capping	47	5	1.59	0.02105
GO:0006821	chloride transport	120	9	4.07	0.02121
GO:0072001	renal system development	64	6	2.17	0.02124
GO:0070830	bicellular tight junction assembly	7	2	0.24	0.02155
GO:0120192	tight junction assembly	7	2	0.24	0.02155
GO:0120162	positive regulation of cold-induced thermogenesis	7	2	0.24	0.02155
GO:0150076	neuroinflammatory response	7	2	0.24	0.02155
GO:0032233	positive regulation of actin filament bundle assembly	7	2	0.24	0.02155
GO:0060973	cell migration involved in heart development	7	2	0.24	0.02155
GO:0043094	cellular metabolic compound salvage	43	7	1.46	0.02209
GO:0009191	ribonucleoside diphosphate catabolic process	65	6	2.21	0.02275
GO:0009134	nucleoside diphosphate catabolic process	65	6	2.21	0.02275
GO:0007168	receptor guanylyl cyclase signaling pathway	48	5	1.63	0.02286
GO:1903963	arachidonate transport	48	5	1.63	0.02286
GO:0050482	arachidonate secretion	48	5	1.63	0.02286
GO:0030834	regulation of actin filament depolymerization	48	5	1.63	0.02286
GO:0030835	negative regulation of actin filament depolymerization	48	5	1.63	0.02286
GO:0042775	mitochondrial ATP synthesis coupled electron transport	48	5	1.63	0.02286
GO:0051125	regulation of actin nucleation	33	4	1.12	0.02467
GO:0032309	icosanoid secretion	49	5	1.66	0.02477
GO:0015669	gas transport	19	3	0.64	0.02515
GO:0010817	regulation of hormone levels	104	8	3.53	0.02529
GO:0006909	phagocytosis	67	6	2.27	0.02598
GO:0098657	import into cell	703	43	23.85	0.02633
GO:0071715	icosanoid transport	50	5	1.7	0.02677
GO:0007196	adenylate cyclase-inhibiting G protein-coupled glutamate receptor signaling pathway	8	2	0.27	0.0281
GO:0019367	fatty acid elongation, saturated fatty acid	8	2	0.27	0.0281
GO:0019368	fatty acid elongation, unsaturated fatty acid	8	2	0.27	0.0281
GO:0036371	protein localization to T-tubule	8	2	0.27	0.0281
GO:0043297	apical junction assembly	8	2	0.27	0.0281
GO:0015866	ADP transport	8	2	0.27	0.0281
GO:0015867	ATP transport	8	2	0.27	0.0281
GO:0072350	tricarboxylic acid metabolic process	24	6	0.81	0.02866
GO:0006937	regulation of muscle contraction	20	3	0.68	0.02885
GO:1990542	mitochondrial transmembrane transport	69	6	2.34	0.0295
GO:0046031	ADP metabolic process	69	6	2.34	0.0295
GO:0098661	inorganic anion transmembrane transport	149	10	5.05	0.03098
GO:0018279	obsolete protein N-linked glycosylation via asparagine	36	4	1.22	0.03281
GO:0006857	oligopeptide transport	36	4	1.22	0.03281
GO:0017158	regulation of calcium ion-dependent exocytosis	21	3	0.71	0.03283
GO:0008016	regulation of heart contraction	21	3	0.71	0.03283
GO:0051310	metaphase chromosome alignment	53	5	1.8	0.03341
GO:0031529	ruffle organization	6	4	0.2	0.03384
GO:0097178	ruffle assembly	6	4	0.2	0.03384
GO:0071696	ectodermal placode development	1	1	0.03	0.03392
GO:0071697	ectodermal placode morphogenesis	1	1	0.03	0.03392
GO:0038060	nitric oxide-cGMP-mediated signaling	1	1	0.03	0.03392
GO:0045299	otolith mineralization	1	1	0.03	0.03392
GO:0061307	cardiac neural crest cell differentiation involved in heart development	1	1	0.03	0.03392
GO:0061308	cardiac neural crest cell development involved in heart development	1	1	0.03	0.03392
GO:0010286	heat acclimation	1	1	0.03	0.03392
GO:1901026	ripoptosome assembly involved in necroptotic process	1	1	0.03	0.03392
GO:0043049	otic placode formation	1	1	0.03	0.03392
GO:0042069	regulation of catecholamine metabolic process	1	1	0.03	0.03392
GO:0042053	regulation of dopamine metabolic process	1	1	0.03	0.03392
GO:0042059	negative regulation of epidermal growth factor receptor signaling pathway	1	1	0.03	0.03392
GO:0060788	ectodermal placode formation	1	1	0.03	0.03392
GO:1902523	positive regulation of protein K63-linked ubiquitination	1	1	0.03	0.03392
GO:1902524	positive regulation of protein K48-linked ubiquitination	1	1	0.03	0.03392
GO:0009590	detection of gravity	1	1	0.03	0.03392
GO:0061945	regulation of protein K48-linked ubiquitination	1	1	0.03	0.03392
GO:0035046	pronuclear migration	1	1	0.03	0.03392
GO:0003147	neural crest cell migration involved in heart formation	1	1	0.03	0.03392
GO:0010070	zygote asymmetric cell division	1	1	0.03	0.03392
GO:0044313	protein K6-linked deubiquitination	1	1	0.03	0.03392
GO:0097343	ripoptosome assembly	1	1	0.03	0.03392
GO:1905627	regulation of serotonin biosynthetic process	1	1	0.03	0.03392
GO:1902442	obsolete regulation of ripoptosome assembly involved in necroptotic process	1	1	0.03	0.03392
GO:1902443	negative regulation of ripoptosome assembly involved in necroptotic process	1	1	0.03	0.03392
GO:0006147	guanine catabolic process	1	1	0.03	0.03392
GO:1903940	negative regulation of TORC2 signaling	1	1	0.03	0.03392
GO:1903179	regulation of dopamine biosynthetic process	1	1	0.03	0.03392
GO:0042416	dopamine biosynthetic process	1	1	0.03	0.03392
GO:0050428	3'-phosphoadenosine 5'-phosphosulfate biosynthetic process	1	1	0.03	0.03392
GO:0033233	regulation of protein sumoylation	1	1	0.03	0.03392
GO:0033234	negative regulation of protein sumoylation	1	1	0.03	0.03392
GO:0033238	regulation of amine metabolic process	1	1	0.03	0.03392
GO:1901185	negative regulation of ERBB signaling pathway	1	1	0.03	0.03392
GO:1903265	positive regulation of tumor necrosis factor-mediated signaling pathway	1	1	0.03	0.03392
GO:0030590	first cell cycle pseudocleavage	1	1	0.03	0.03392
GO:1900044	regulation of protein K63-linked ubiquitination	1	1	0.03	0.03392
GO:0030588	pseudocleavage	1	1	0.03	0.03392
GO:0006776	vitamin A metabolic process	1	1	0.03	0.03392
GO:0009949	polarity specification of anterior/posterior axis	1	1	0.03	0.03392
GO:0035927	RNA import into mitochondrion	1	1	0.03	0.03392
GO:0060974	cell migration involved in heart formation	1	1	0.03	0.03392
GO:0033866	nucleoside bisphosphate biosynthetic process	1	1	0.03	0.03392
GO:0006868	glutamine transport	1	1	0.03	0.03392
GO:0034030	ribonucleoside bisphosphate biosynthetic process	1	1	0.03	0.03392
GO:0034033	purine nucleoside bisphosphate biosynthetic process	1	1	0.03	0.03392
GO:0034036	purine ribonucleoside bisphosphate biosynthetic process	1	1	0.03	0.03392
GO:0016031	tRNA import into mitochondrion	1	1	0.03	0.03392
GO:0065001	specification of axis polarity	1	1	0.03	0.03392
GO:0045167	asymmetric protein localization involved in cell fate determination	1	1	0.03	0.03392
GO:0007010	cytoskeleton organization	1633	94	55.4	0.03478
GO:0051260	protein homooligomerization	91	7	3.09	0.03514
GO:0018996	molting cycle, collagen and cuticulin-based cuticle	9	2	0.31	0.03533
GO:0048645	animal organ formation	9	2	0.31	0.03533
GO:0060976	coronary vasculature development	9	2	0.31	0.03533
GO:0007584	response to nutrient	9	2	0.31	0.03533
GO:1901880	negative regulation of protein depolymerization	54	5	1.83	0.03583
GO:0043242	negative regulation of protein-containing complex disassembly	54	5	1.83	0.03583
GO:0060326	cell chemotaxis	37	4	1.26	0.03584
GO:1904263	positive regulation of TORC1 signaling	22	3	0.75	0.03709
GO:0021591	ventricular system development	22	3	0.75	0.03709
GO:0006936	muscle contraction	55	5	1.87	0.03835
GO:0015698	inorganic anion transport	199	12	6.75	0.03957
GO:0001822	kidney development	56	5	1.9	0.04098
GO:0006897	endocytosis	568	32	19.27	0.04129
GO:0006911	phagocytosis, engulfment	23	3	0.78	0.0416
GO:0043101	purine-containing compound salvage	23	3	0.78	0.0416
GO:0009179	purine ribonucleoside diphosphate metabolic process	75	6	2.54	0.04191
GO:0009135	purine nucleoside diphosphate metabolic process	75	6	2.54	0.04191
GO:0060261	positive regulation of transcription initiation by RNA polymerase II	10	2	0.34	0.04318
GO:0050728	negative regulation of inflammatory response	10	2	0.34	0.04318
GO:0009749	response to glucose	10	2	0.34	0.04318
GO:0120193	tight junction organization	10	2	0.34	0.04318
GO:2000144	positive regulation of DNA-templated transcription initiation	10	2	0.34	0.04318
GO:0044057	regulation of system process	57	5	1.93	0.04372
GO:0019364	pyridine nucleotide catabolic process	76	6	2.58	0.04425
GO:0051647	nucleus localization	76	6	2.58	0.04425
GO:0007097	nuclear migration	76	6	2.58	0.04425
GO:0003333	amino acid transmembrane transport	101	12	3.43	0.04572
GO:1903510	mucopolysaccharide metabolic process	40	4	1.36	0.04584
GO:0007338	single fertilization	24	3	0.81	0.04638
GO:0006120	mitochondrial electron transport, NADH to ubiquinone	24	3	0.81	0.04638
GO:0006904	vesicle docking involved in exocytosis	24	3	0.81	0.04638
GO:0072526	pyridine-containing compound catabolic process	77	6	2.61	0.04667
GO:0006066	alcohol metabolic process	205	12	6.95	0.04772
GO:0032386	regulation of intracellular transport	70	9	2.37	0.04894
GO:0019646	aerobic electron transport chain	59	5	2	0.04951
GO:0009306	protein secretion	119	8	4.04	0.04992

## Sheet: Supp_Tab_S2
SRA acc. no.	Time point (hpf)	Developmental stage	Biological replicate	Number of trimmed reads	Number of uniquely mapped reads	% of uniquely mapping reads	No. of multi-mapped reades	% of multi-mapped reads	No. of unmapped reads	% of unmapped reads
SRR25387458	0	Unfertilized Egg	R2	31614834	22677680	0.7173	4525340	0.1431	4411814	0.1396
SRR25387459	0	Unfertilized Egg	R1	31229282	22930909	0.7343	3631800	0.1163	4666573	0.1494
SRR25387436	4	Zygote	R2	31573942	22238537	0.7043	4747330	0.1504	4588075	0.1453
SRR25387447	4	Zygote	R1	31215045	22657854	0.7259	3980706	0.1275	4576485	0.1466
SRR25387434	8	Embryo	R2	31679197	22361698	0.7059	5224621	0.1649	4092878	0.1292
SRR25387435	8	Embryo	R1	31137192	22231464	0.714	4558377	0.1463	4347351	0.1396
SRR25387432	12	Gastrula 1	R2	30684472	21477819	0.7	5351506	0.1744	3855147	0.1257
SRR25387433	12	Gastrula 1	R1	31006745	22158048	0.7146	4808473	0.1551	4040224	0.1303
SRR25387430	16	Gastrula 2	R2	31129558	21172217	0.6801	5943113	0.191	4014228	0.1289
SRR25387431	16	Gastrula 2	R1	31108790	22366338	0.719	4797011	0.1542	3945441	0.1268
SRR25387456	20	Trochophore 1	R2	31313006	21923726	0.7001	5234475	0.1671	4154805	0.1327
SRR25387457	20	Trochophore 1	R1	31153366	22818864	0.7325	4258642	0.1367	4075860	0.1308
SRR25387454	24	Trochophore 2	R2	31237678	21993262	0.7041	5095540	0.1632	4148876	0.1329
SRR25387455	24	Trochophore 2	R1	30568998	22102616	0.723	4376490	0.1431	4089892	0.1338
SRR25387452	28	Trochophore 3	R2	31251736	22218911	0.711	4737140	0.1516	4295685	0.1374
SRR25387453	28	Trochophore 3	R1	30151120	21916806	0.7269	4155633	0.1378	4078681	0.1353
SRR25387450	32	Advanced Trochophore 1	R2	31450472	22501615	0.7155	4808549	0.1529	4140308	0.1316
SRR25387451	32	Advanced Trochophore 1	R1	30344616	22168913	0.7306	4088100	0.1347	4087603	0.1347
SRR25387448	36	Advanced Trochophore 2	R2	31281625	22138801	0.7077	5099606	0.163	4043218	0.1292
SRR25387449	36	Advanced Trochophore 2	R1	30446461	22282130	0.7318	4164126	0.1368	4000205	0.1313
SRR25387445	40	Advanced Trochophore 3	R2	31286823	22253466	0.7113	4808187	0.1537	4225170	0.135
SRR25387446	40	Advanced Trochophore 3	R1	30427358	22021178	0.7237	4139754	0.1361	4266426	0.1402
SRR25387443	44	D-veliger 1	R2	30469689	21902055	0.7188	4591610	0.1506	3976024	0.1305
SRR25387444	44	D-veliger 1	R1	30486877	22346398	0.733	4187438	0.1374	3953041	0.1296
SRR25387441	48	D-veliger 2	R2	30209384	21152507	0.7002	5122804	0.1695	3934073	0.1303
SRR25387442	48	D-veliger 2	R1	30492559	22356764	0.7332	4132649	0.1355	4003146	0.1312
SRR25387439	52	D-veliger 3	R2	30581805	22287023	0.7288	4273235	0.1398	4021547	0.1315
SRR25387440	52	D-veliger 3	R1	30540062	22508657	0.737	3938157	0.129	4093248	0.134
SRR25387437	72	Late D-veliger	R2	31144538	22754899	0.7306	4155579	0.1335	4234060	0.136
SRR25387438	72	Late D-veliger	R1	31504212	23356674	0.7414	3830231	0.1216	4317307	0.137

## Sheet: Supp_Tab_S3
Species	Gene acc. no.	Orthology group	Gene name
Phreagena okutanii	DN44424.c0.g1.i2.p1	Vasa/Ddx4	-
Calyptogena (Archivesica) marissinica	Ama38729	Vasa/Ddx4	-
Calyptogena (Archivesica) marissinica	Ama38727	Vasa/Ddx4	-
Corbicula fluminea	DN125059.c0.g1.i19.p1	Vasa/Ddx4	-
Mactra chinensis	DN48157.c2.g2.i2.p1	Vasa/Ddx4	-
Ruditapes decussatus	DN22317.c4.g2.i1.p1	Vasa/Ddx4	-
Ruditapes philippinarum	XP_060562671.1	Vasa/Ddx4	-
Mercenaria mercenaria	XP_053394752.1	Vasa/Ddx4	-
Cyclina sinensis	Hic.asm.11.970.2	Vasa/Ddx4	-
Pisidium coreanum	DN31082.c0.g1.i7.p1	Vasa/Ddx4	-
Dreissena polymorpha	XP_052283635.1	Vasa/Ddx4	-
Mya arenaria	XP_052775885.1	Vasa/Ddx4	-
Sinonovacula constricta	Chr8.1697	Vasa/Ddx4	-
Solen grandis	DN2375.c0.g1.i12.p1	Vasa/Ddx4	-
Tridacna squamosa	DN1975.c0.g1.i5.p1	Vasa/Ddx4	-
Panopea generosa	DN2386.c0.g1.i4.p1	Vasa/Ddx4	-
Cristaria plicata	DN71694.c8.g1.i1.p1	Vasa/Ddx4	-
Hyriopsis bialata (Unio delphinus)	M00000006703	Vasa/Ddx4	-
Potamilus streckersoni	KAK3601505.1	Vasa/Ddx4	-
Margaritifera margaritifera	MMAM00000026330	Vasa/Ddx4	-
Perna viridis	s01977g89	Vasa/Ddx4	-
Perumytilus purpuratus	DN96437.c0.g1.i2.p1	Vasa/Ddx4	-
Mytilus galloprovincialis	VDI03911.1	Vasa/Ddx4	-
Mytilus galloprovincialis	VDI03912.1	Vasa/Ddx4	-
Modiolus modiolus	DN179.c0.g1.i2.p1	Vasa/Ddx4	-
Argopecten irradians concentricus	Contig172.33	Vasa/Ddx4	-
Pecten maximus	XP_033738807.1	Vasa/Ddx4	-
Patinopecten yessoensis	XP_021370692.1	Vasa/Ddx4	-
Ostrea edulis	XP_056020028.1	Vasa/Ddx4	-
Magallana (Crassostrea) gigas	XP_011437246.2	Vasa/Ddx4	-
Crassostra virginica	XP_022316564.1	Vasa/Ddx4	-
Saccostrea glomerata	Sgl001349	Vasa/Ddx4	-
Pinctada margaritifera	DN36893.c1.g3.i1.p1	Vasa/Ddx4	-
Atrina pectinata	DN813.c0.g1.i1.p1	Vasa/Ddx4	-
Tegillarca granosa	KAJ8305640.1	Vasa/Ddx4	-
Anadara (Scapharca) broughtonii	EVM0008860.1	Vasa/Ddx4	-
Drosophila melanogaster	NP_001260458.1	Vasa/Ddx4	vasa
Homo sapiens	NP_077726.1	Vasa/Ddx4	DDX4
Mus musculus	NP_001139357.1	Vasa/Ddx4	Ddx4
Danio rerio	NP_571132.1	Vasa/Ddx4	ddx4
Caenorhabditis elegans	NP_491876.1	Vasa/Ddx4	glh-2
Caenorhabditis elegans	NP_491963.1	Vasa/Ddx4	glh-1
Caenorhabditis elegans	NP_491681.1	Vasa/Ddx4	glh-3
Caenorhabditis elegans	NP_491207.3	Vasa/Ddx4	glh-4
Magallana (Crassostrea) gigas	XP_011446924.2	Ddx3	-
Magallana (Crassostrea) gigas	XP_034330003.1	Ddx3	-
Crassostra virginica	XP_022337075.1	Ddx3	-
Ostrea edulis	XP_056006193.1	Ddx3	-
Saccostrea glomerata	Sgl003232	Ddx3	-
Atrina pectinata	DN371.c0.g4.i2.p1	Ddx3	-
Pinctada margaritifera	DN39745.c0.g1.i3.p1	Ddx3	-
Perumytilus purpuratus	DN34627.c0.g1.i16.p1	Ddx3	-
Perna viridis	s00037g119	Ddx3	-
Mytilus galloprovincialis	VDI00208.1	Ddx3	-
Modiolus modiolus	DN49076.c0.g1.i10.p1	Ddx3	-
Tegillarca granosa	KAJ8310842.1	Ddx3	-
Argopecten irradians concentricus	Contig829.57.3	Ddx3	-
Pecten maximus	XP_033759680.1	Ddx3	-
Patinopecten yessoensis	XP_021341010.1	Ddx3	-
Hyriopsis bialata (Unio delphinus)	M00000003015	Ddx3	-
Cristaria plicata	DN67742.c10.g2.i2.p1	Ddx3	-
Megalonaias nervosa	g136014.t1	Ddx3	-
Potamilus streckersoni	KAK3605786.1	Ddx3	-
Margaritifera margaritifera	MMAM00000009046	Ddx3	-
Ruditapes decussatus	DN22481.c1.g4.i1.p1	Ddx3	-
Ruditapes philippinarum	XP_060588962.1	Ddx3	-
Cyclina sinensis	Hic.asm.6.43.1	Ddx3	-
Calyptogena (Archivesica) marissinica	Ama32770	Ddx3	-
Phreagena okutanii	DN58569.c0.g1.i6.p1	Ddx3	-
Mactra chinensis	DN49476.c41.g3.i1.p1	Ddx3	-
Corbicula fluminea	DN126815.c0.g1.i7.p1	Ddx3	-
Dreissena polymorpha	XP_052217061.1	Ddx3	-
Mya arenaria	XP_052782518.1	Ddx3	-
Pisidium coreanum	DN3392.c0.g2.i6.p1	Ddx3	-
Sinonovacula constricta	Chr9.1187	Ddx3	-
Sinonovacula constricta	Chr9.1230	Ddx3	-
Solen grandis	DN51.c4.g1.i12.p1	Ddx3	-
Panopea generosa	DN13909.c0.g3.i2.p1	Ddx3	-
Tridacna squamosa	DN33643.c0.g2.i2.p1	Ddx3	-
Danio rerio	NP_001119895.1	Ddx3	ddx3xa
Danio rerio	NP_571016.2	Ddx3	ddx3xb
Mus musculus	NP_149068.1	Ddx3	Pl10
Homo sapiens	NP_001180346.1	Ddx3	DDX3X
Drosophila melanogaster	NP_001262379.1	Ddx3	bel
Pisidium coreanum	DN29220.c0.g1.i2.p1	Ddx3	-
Caenorhabditis elegans	NP_001021793.1	Ddx3	vbh-1
Caenorhabditis elegans	NP_001254859.1	Ddx3	laf-1
Pisidium coreanum	DN19615.c0.g1.i2.p1	Ddx3	-

## Sheet: Supp_Tab_S4
Pool name	Sequence
B1_10B017427_vasa_33	GAGGAGGGCAGCAAACGGaaAAATGCTGTAAAAACAAAACGTATA
	TTAAAATGTTGAAAATGATTTAATAtaGAAGAGTCTTCCTTTACG
	GAGGAGGGCAGCAAACGGaaAGAGTTCATCACGATTAAAGAAAGA
	ACTTAAAAACATTACATCATACAGAtaGAAGAGTCTTCCTTTACG
	GAGGAGGGCAGCAAACGGaaGCACATGATTTAAGGTAGCACTACT
	AAACAAATAAGAACTGGATTTGATTtaGAAGAGTCTTCCTTTACG
	GAGGAGGGCAGCAAACGGaaGACGAACCTTCTCCCAGACAGGCCG
	AAAAATAATGCCCGCTTTCCAATCAtaGAAGAGTCTTCCTTTACG
	GAGGAGGGCAGCAAACGGaaTTCAGCTGTTGGTTCACTTGGTAAA
	CCAATAGTGATTACCTAACTGAACAtaGAAGAGTCTTCCTTTACG
	GAGGAGGGCAGCAAACGGaaGCAAGACATGGCCTGGTTTATAGTT
	ATTATGGCCTAATGGTTTTAGGTCGtaGAAGAGTCTTCCTTTACG
	GAGGAGGGCAGCAAACGGaaACATTCCCACTGCTAAGTCGTATGA
	GTGACAACTGATTTTGATTTATATGtaGAAGAGTCTTCCTTTACG
	GAGGAGGGCAGCAAACGGaaCATTGAAGAATTATCTGCTGAGAGT
	TGCACCCACTTTTAGGTCCAAACAAtaGAAGAGTCTTCCTTTACG
	GAGGAGGGCAGCAAACGGaaGCATTCATTCAAATATGAATGGAGT
	ACAATTCCTGCTTCCTCGCAGGTTAtaGAAGAGTCTTCCTTTACG
	GAGGAGGGCAGCAAACGGaaAGAATGTGATTAATCCCAGGATTCC
	ATTTACAATGGTTGGAATAACAATGtaGAAGAGTCTTCCTTTACG
	GAGGAGGGCAGCAAACGGaaTTGTCCTTGGTTGGTCTTTTCTGAT
	CTCCGGAATCTCCTGTGTGGTTGTCtaGAAGAGTCTTCCTTTACG
	GAGGAGGGCAGCAAACGGaaCTGAATCATCTGTGTAGAAACTGGT
	GTAACAAAGCTTTTGCAATTCCACCtaGAAGAGTCTTCCTTTACG
	GAGGAGGGCAGCAAACGGaaACATGTTTAACAAGAGGAATGTCTA
	ATAGATTGTGGAAGGTCATAATTTAtaGAAGAGTCTTCCTTTACG
	GAGGAGGGCAGCAAACGGaaGCAAGGAAGTCAGCATTTCTTTTCT
	GGAAATCCAGACTGAGACAAGTAAGtaGAAGAGTCTTCCTTTACG
	GAGGAGGGCAGCAAACGGaaATGCACATACTGTGCAACATCGGTA
	TTGACGTTTCTGATCACGGGGAACTtaGAAGAGTCTTCCTTTACG
	GAGGAGGGCAGCAAACGGaaTTGCACTGAACATAAGAGTTTGTCT
	CAAGTCTCTGGATTTCTTCTGGGAAtaGAAGAGTCTTCCTTTACG
	GAGGAGGGCAGCAAACGGaaCTTTCCTTTACCAATGACATCAATT
	TAAATATTTCAGCTTTTCTAAACTGtaGAAGAGTCTTCCTTTACG
	GAGGAGGGCAGCAAACGGaaCTACAGGTCTTAACATTGTGCCATG
	GTCCAAGAGAGGTTCCTCCATATAAtaGAAGAGTCTTCCTTTACG
	GAGGAGGGCAGCAAACGGaaGAGAATGAACTACCAGTCAGTCCAT
	ACTAAAGCCTGTGGCTCCTGAACTAtaGAAGAGTCTTCCTTTACG
	GAGGAGGGCAGCAAACGGaaGACTTTTTCACATTTTTAAGAAAGG
	TGTACAGGTGTTGGTCTATCATAGTtaGAAGAGTCTTCCTTTACG
	GAGGAGGGCAGCAAACGGaaTGCGTGTATGGTTTTAAAAATTTCA
	TTTTTCATATTTGTCAAAGTTTATGtaGAAGAGTCTTCCTTTACG
	GAGGAGGGCAGCAAACGGaaGGGCCATATGTCCTTCTTCATTACA
	AAAGACCTTCTGCTTTAGGACAATCtaGAAGAGTCTTCCTTTACG
	GAGGAGGGCAGCAAACGGaaCACTTTCATTACATTTGAAGCAGTT
	CATTAGGACACTCTCTTGCCATGTGtaGAAGAGTCTTCCTTTACG
	GAGGAGGGCAGCAAACGGaaCCTTTGCCTCCACCACCTGATCCTC
	CCACTTTCACCACATTTGAAGCAGTtaGAAGAGTCTTCCTTTACG
	GAGGAGGGCAGCAAACGGaaCCTCCACCTTTATTTCCTCCAAATC
	CCCCCTTTGCTGCCAAATCCACCATtaGAAGAGTCTTCCTTTACG
	GAGGAGGGCAGCAAACGGaaAGATATGCTCATGTCCTTTACCCCT
	AGGCTTTCCTCCAAAAGCAGGGGGTtaGAAGAGTCTTCCTTTACG
	GAGGAGGGCAGCAAACGGaaTCCTTGAGCACGGCCTCTACTTGGT
	TCTTCCAAACCCACCACGCCCAAAAtaGAAGAGTCTTCCTTTACG
	GAGGAGGGCAGCAAACGGaaATTGTACTGATTTAAGGTGTTTGTT
	ATAACAATTTCATCGTCCCAGGACTtaGAAGAGTCTTCCTTTACG
	GAGGAGGGCAGCAAACGGaaACTTGTAAAATTTCATCAACCACGT
	AACTAACTAAACATGCAAATTCATCtaGAAGAGTCTTCCTTTACG
	GAGGAGGGCAGCAAACGGaaGTGAAAACAAACGAATGTTAAAATT
	AAAAATATGGTCACATGAACTTCAAtaGAAGAGTCTTCCTTTACG
	GAGGAGGGCAGCAAACGGaaTTGAAACTTTTAGAACAATATTATA
	ACAGTGTAACATTTTCCTGCATGCCtaGAAGAGTCTTCCTTTACG
	GAGGAGGGCAGCAAACGGaaGTCAGTTATCTTCTTTTTCAAACAG
	CTTCTACTGCTGTCATTGTGAATATtaGAAGAGTCTTCCTTTACG
	GAGGAGGGCAGCAAACGGaaCAGACAGTTCCCTTGCCTTTTCTTC
	TGTGTAGTCCCCTTCAACCCTTTCGtaGAAGAGTCTTCCTTTACG
B2_10B093608_dmrt1l_32	CCTCGTAAATCCTCATCAaaaaaaaagggggggtatttttttaaa
	AAAAATAATGTCTCGATTTTCAttaaaATCATCCAGTAAACCGCC
	CCTCGTAAATCCTCATCAaaAACAAAGCTCTCAATATGATATATC
	taaccaCTTCCAGATATAACTTGAGaaATCATCCAGTAAACCGCC
	CCTCGTAAATCCTCATCAaaAAGTAACACAgctaaaaaattaaga
	CAGTTGAACTTTATTTCCATACCTTaaATCATCCAGTAAACCGCC
	CCTCGTAAATCCTCATCAaattatacaaattattaacatTGACTG
	ttataccTCCCTCATCTTGTATCCAaaATCATCCAGTAAACCGCC
	CCTCGTAAATCCTCATCAaaAAATCACCCCCTGGTGGTGGACAAA
	ACACATATTCCAACCTTATTTTTGGaaATCATCCAGTAAACCGCC
	CCTCGTAAATCCTCATCAaaATGAATGTTGATAATCAAAAGTACT
	CTATGATTCATATCAAGTATCATTAaaATCATCCAGTAAACCGCC
	CCTCGTAAATCCTCATCAaatacatgatatatggggATATGAAGT
	TCAGACAAAGCATTGTATCtttgaaaaATCATCCAGTAAACCGCC
	CCTCGTAAATCCTCATCAaaTAACTTGTTTGCAAAACATTCCCTT
	TGACCTGGACTTTGCAAACCAAAATaaATCATCCAGTAAACCGCC
	CCTCGTAAATCCTCATCAaaaacatttaaaaatttgttcTCCTGA
	ACGGGCACCAAACATGTCAATTTtcaaATCATCCAGTAAACCGCC
	CCTCGTAAATCCTCATCAaaATTTTGCAGACTCACATTCTTATGT
	atttaaaacattatgtttGTCACCTaaATCATCCAGTAAACCGCC
	CCTCGTAAATCCTCATCAaaaaaattaattcaaagtatAGATAAT
	TTAAGACACACTATCTGGTGCTTGGaaATCATCCAGTAAACCGCC
	CCTCGTAAATCCTCATCAaaACAGACACgaaactttgtatatata
	TTTCAATGCATTCAAAAGTTCTATAaaATCATCCAGTAAACCGCC
	CCTCGTAAATCCTCATCAaaCATGCAGACAGACACTCCTAACAAT
	tggaatgtAAAAATTACAGACTTCAaaATCATCCAGTAAACCGCC
	CCTCGTAAATCCTCATCAaaTCATTATTATACTTCAAAGGTGTGC
	TCACCTCACCCTCAACAATAGCAAGaaATCATCCAGTAAACCGCC
	CCTCGTAAATCCTCATCAaaTTTGAATTCGTTCgtattagtaaat
	CTATAATTATTTACCCCCTGAATTGaaATCATCCAGTAAACCGCC
	CCTCGTAAATCCTCATCAaaTTTCTCCTCTTATGACAACTATCTT
	aatcatttttagaaCATCAAAATATaaATCATCCAGTAAACCGCC
	CCTCGTAAATCCTCATCAaactttttttattggtaaatttgtcat
	TCTTGTATTTTAACATTTatcatacaaATCATCCAGTAAACCGCC
	CCTCGTAAATCCTCATCAaaAAATTTCTACAATTtgcacatgtat
	acttttaaaaaatgatgtgTTTGTAaaATCATCCAGTAAACCGCC
	CCTCGTAAATCCTCATCAaaAATGAAATATGCACTAATCaaataa
	tttaattggtcTTAAGATATTTTGAaaATCATCCAGTAAACCGCC
	CCTCGTAAATCCTCATCAaaTTCTCAAATATGGTGCCTTAAATCC
	tagtaaatgtaaATTGTAGCTTTGTaaATCATCCAGTAAACCGCC
	CCTCGTAAATCCTCATCAaaATGCATGACTACAGAGATTTAAACT
	GAAAGTTCTAACAGATTCAATTAAAaaATCATCCAGTAAACCGCC
	CCTCGTAAATCCTCATCAaaAGCCACGACTACAAAATTAAGTTTC
	AAAAACGTTCGTCCTTCTATCTTGTaaATCATCCAGTAAACCGCC
	CCTCGTAAATCCTCATCAaaGTACAGTTGAATGTGGAATATCATG
	CTTGTTGGCTAGCTGGAGTTCCATAaaATCATCCAGTAAACCGCC
	CCTCGTAAATCCTCATCAaaATTGTACGGCATACTTGGTGTGGCA
	TGGTCCCTGCATATATCCTGGGGTTaaATCATCCAGTAAACCGCC
	CCTCGTAAATCCTCATCAaaTGTAACAGTTGGTGGATAAAATCCA
	TGATGGTGGGTATGGTCGTGGATAGaaATCATCCAGTAAACCGCC
	CCTCGTAAATCCTCATCAaaATTATTCTACACTCTGTGCACCAAC
	TGGCTACACACAGAGGACTGACAATaaATCATCCAGTAAACCGCC
	CCTCGTAAATCCTCATCAaaCTCGCACTAGATTTTTAACACCATG
	CTCTGTATGGACAACTATCCTTGTGaaATCATCCAGTAAACCGCC
	CCTCGTAAATCCTCATCAaaTCTGTCAGATATTGGATTTTGCTGT
	TTGACATCTACGGCAATATACAGCTaaATCATCCAGTAAACCGCC
	CCTCGTAAATCCTCATCAaacaaatttttttacattttccattTC
	TTCCTTTCCTATTTGCTTgttctgtaaATCATCCAGTAAACCGCC
	CCTCGTAAATCCTCATCAaaCTGGCGTTTAATACTAACAACCTGA
	TTTTTGAGCAGTAACTATCTTGTTTaaATCATCCAGTAAACCGCC
	CCTCGTAAATCCTCATCAaaATCTAACATGGACACCATGAGCAAG
	AAAAACATCCAAGCTTGTGACCTTTaaATCATCCAGTAAACCGCC
	CCTCGTAAATCCTCATCAaaTGGCGGAATTTTGACGTTACTTTCA
	aaattacAACTTCTTTCTTTCTCTTaaATCATCCAGTAAACCGCC
B3_10B014180_soxh_27	GTCCCTGCCTCTATATCTttCTTTTCTCTTGAGACATCCACATTT
	ATTTAGTTTATCGTCTTCTCCCTTTttCCACTCAACTTTAACCCG
	GTCCCTGCCTCTATATCTttCTTGAGACATCCACATTTAGTTTAT
	TTATCGTCTTCTCCCTTTTCTTTTTttCCACTCAACTTTAACCCG
	GTCCCTGCCTCTATATCTttCATCCACATTTAGTTTATCGTCTTT
	TTCTCCCTTTTTCCTTTTCTCTTGAttCCACTCAACTTTAACCCG
	GTCCCTGCCTCTATATCTttATTTAGTTTATCGTCTTCTCCCTTT
	CTTTTCCTTTTCTCTTGAGACATCCttCCACTCAACTTTAACCCG
	GTCCCTGCCTCTATATCTttATATGCTCTACTAAAGACCTAGAGA
	TTTTCTCTACAGAAGTAGGTACAATttCCACTCAACTTTAACCCG
	GTCCCTGCCTCTATATCTttTTTCCTTTTCTCTTGAGACATCCAC
	CAACATTTAGTTTATCGTCTTCTCCttCCACTCAACTTTAACCCG
	GTCCCTGCCTCTATATCTttTTCTCTTGAGACATCCACATTTAGT
	TAGTTTATCGTCTTCTCCCTTTTCCttCCACTCAACTTTAACCCG
	GTCCCTGCCTCTATATCTttGAGACATCCACATTTAGTTTATCGT
	TCGTCTTCTCCCTTTTCCTTTTCTCttCCACTCAACTTTAACCCG
	GTCCCTGCCTCTATATCTttACATGTCGTCCACGTGAGATTCCTG
	CAATGGTATCATCTATTGGACCCTCttCCACTCAACTTTAACCCG
	GTCCCTGCCTCTATATCTttGTCTTCTGGATGTTCCTCTCTCAGC
	TGCTGGTGGGAACGGGAACGGCCAAttCCACTCAACTTTAACCCG
	GTCCCTGCCTCTATATCTttGCAAGCTCTGAATCATCATCGGTAG
	GTCGTACTTCCGGGAAGAGTGGTAGttCCACTCAACTTTAACCCG
	GTCCCTGCCTCTATATCTttCTGCTTTCTTTGATTTCTTTGAAGA
	TGTCTGTGTCTAAAGTGTTGCTATGttCCACTCAACTTTAACCCG
	GTCCCTGCCTCTATATCTttTCTTTAGCTCTTTATCCTCTACTGG
	TTTTTCTTGTCCTCTGTGCTTTCTTttCCACTCAACTTTAACCCG
	GTCCCTGCCTCTATATCTttGGGTGCTTGTGTATCTTTCTGACAT
	GTCAGTATTGTCATAAGCAGACGTCttCCACTCAACTTTAACCCG
	GTCCCTGCCTCTATATCTttGCATTACAGGCTTTGCTTTCCAATG
	TCATTTGTCTTTTCATTCTTTTCTGttCCACTCAACTTTAACCCG
	GTCCCTGCCTCTATATCTttGACCACAGGCGGTCTACCCCTCGGA
	TGCTGGAACAGCTTTAAGTCTCTCAttCCACTCAACTTTAACCCG
	GTCCCTGCCTCTATATCTttTGTATTATTGTGACATTTTGTACGG
	GGTATTTGAACAGGAACTGGTTTGGttCCACTCAACTTTAACCCG
	GTCCCTGCCTCTATATCTttATCTTGGAACGTCTTGAAAAGGAAG
	TGTAGTCAGGTATTCCTGCTGTTTGttCCACTCAACTTTAACCCG
	GTCCCTGCCTCTATATCTttGAATGGCTGTCCGTACATGGGATAT
	ATTTCcaTTCAAGAAATTCCTTGGCttCCACTCAACTTTAACCCG
	GTCCCTGCCTCTATATCTttGGACAGACAAATTGGTTACCTTGAG
	ATTGGTTGAACGATTCGTAGTCCTGttCCACTCAACTTTAACCCG
	GTCCCTGCCTCTATATCTttCATTACGGGGTAATATTGGTCTGTT
	GCATCGTTACAGGTTGAATAGGCATttCCACTCAACTTTAACCCG
	GTCCCTGCCTCTATATCTttATCCCAGTACCTGGCATGAGAGTAG
	GAACTTTGACCAGGTGTTCTATACGttCCACTCAACTTTAACCCG
	GTCCCTGCCTCTATATCTttTGTTTTCTGACATTCCTGAGGGTTT
	tCCATCTGCTGACATAAAGAAAATCttCCACTCAACTTTAACCCG
	GTCCCTGCCTCTATATCTttGCATTTGCAAGTATCGGCATTTTGT
	GCTTGAAATGGTGTTGCAACATTCAttCCACTCAACTTTAACCCG
	GTCCCTGCCTCTATATCTttTTTTAACTGTTTCAATACTCCGTCC
	CAGGTTCGGGTGAATGACATACAACttCCACTCAACTTTAACCCG
	GTCCCTGCCTCTATATCTtttttatttatgcaaAGTCCATTTTCA
	TTTCTGTGTTAAATTAGccgaatttttCCACTCAACTTTAACCCG
	GTCCCTGCCTCTATATCTttTTATCAGATGAAACATGTTCTGAAA
	CCCGGCGATAAAGTTTTGCTGATTTttCCACTCAACTTTAACCCG
B4_10B094018_foxl2_28	CCTCAACCTACCTCCAACaaagaaaaaaataacaataaatataat
	TTGCATGGTAAGAAATTGcctttaaatTCTCACCATATTCGCTTC
	CCTCAACCTACCTCCAACaaTAATTTTCTCTTGTAGGCTCCATAA
	ttaaaatatgaataaaattctCGATatTCTCACCATATTCGCTTC
	CCTCAACCTACCTCCAACaaCATTCAGGTATGATACAATATCTCA
	TTTTTCTGGCACAGAATCGTGACACatTCTCACCATATTCGCTTC
	CCTCAACCTACCTCCAACaaTCCAGTAGGTATAATGCACCGCCTC
	ACTGTATGGCAATTATTTACCTCTCatTCTCACCATATTCGCTTC
	CCTCAACCTACCTCCAACaaACTGGAGCCCATCGAACTGTAGTCG
	TTGTTGTCTGTAAGGAAAGGGAAATatTCTCACCATATTCGCTTC
	CCTCAACCTACCTCCAACaaTTCATTTGCATGGCTGATTGCATTG
	AACTGGGGAAATGTTGGTCCAGGATatTCTCACCATATTCGCTTC
	CCTCAACCTACCTCCAACaaCCGGTGGCGGAACACGGGACTGGTT
	TATAACTACAGGCCGCTAAACTGGGatTCTCACCATATTCGCTTC
	CCTCAACCTACCTCCAACaaTGGAGATGCAGAATTTGGTGCCAGA
	ACTGttataactgtttatttgtgACatTCTCACCATATTCGCTTC
	CCTCAACCTACCTCCAACaaTACGCTGGCGGTGAAAAATACGGTT
	CACGGCGAATATTGTGAATACTGAGatTCTCACCATATTCGCTTC
	CCTCAACCTACCTCCAACaaAGTGTCCGTCCACAAATAATGGTTT
	TTAAAGAAAATTGGTTGTATGGAGAatTCTCACCATATTCGCTTC
	CCTCAACCTACCTCCAACaaACGCATTCTTCGTCGACGTCGGTAG
	GAGAGATATCGATGCTCGGTATGGTatTCTCACCATATTCGCTTC
	CCTCAACCTACCTCCAACaaGGGTCTAAAGTCCAATAATTCCCTT
	CCTTTCTCAAACATGTCTTCAAATGatTCTCACCATATTCGCTTC
	CCTCAACCTACCTCCAACaaTTACAAAACATTCATTCAGACTTAG
	GTTCTCCCCCACCTTCTCTTGGGACatTCTCACCATATTCGCTTC
	CCTCAACCTACCTCCAACaaCTTATTTTTCTCATAGTAGGGAAAT
	GTGACGAATACTATTTTGCCATCCTatTCTCACCATATTCGCTTC
	CCTCAACCTACCTCCAACaaAGTGTTAATCTTTTATCATCGCATT
	TTCATGATATATTGATAAATTCCACatTCTCACCATATTCGCTTC
	CCTCAACCTACCTCCAACaaAAGAATATGGTGGTTTGACATCGGG
	TAATTGCCATAGCAATAAGAGCAACatTCTCACCATATTCGCTTC
	CCTCAACCTACCTCCAACaaTTTGTTTCCTCTTTCTGGTTGTTTT
	TTTTTCACCGGTTTATTCACAGATTatTCTCACCATATTCGCTTC
	CCTCAACCTACCTCCAACaaCATTCTGTTTGCTACTATTCTCCAT
	TCTTATCTTCAAAAGTAGATTTATTatTCTCACCATATTCGCTTC
	CCTCAACCTACCTCCAACaaTTTAACATGTTCAGGAATTGTAGGT
	TGCAGCGATTCCACATTTTCCGCTAatTCTCACCATATTCGCTTC
	CCTCAACCTACCTCCAACaaCTGAATTGCGATTTCGCAGAGCGGT
	CACATTTTCGAGTCCATAAAGTTTTatTCTCACCATATTCGCTTC
	CCTCAACCTACCTCCAACaaCCGTCAAACTGTcatctaaattttg
	GTCTTAATTTAAAATCCAAATCTGAatTCTCACCATATTCGCTTC
	CCTCAACCTACCTCCAACaataatattagAATTTACCAAACACGC
	tattttcatgttttccattttgtaaatTCTCACCATATTCGCTTC
	CCTCAACCTACCTCCAACaaCATCGATTTTAttttttttgttgaa
	TCATAATGAAGTTATATaTGTCTTTatTCTCACCATATTCGCTTC
	CCTCAACCTACCTCCAACaaTAACTTCTTCATTTTTGTTGCATTC
	CTCAGGTTTTAGTGACTTCAAAATCatTCTCACCATATTCGCTTC
	CCTCAACCTACCTCCAACaaTAGTCACCAAATGTATTTCTCATGG
	TTTTCTTCCTCTTTAATTTTCTGTCatTCTCACCATATTCGCTTC
	CCTCAACCTACCTCCAACaaCACTTCTCAGGATCTTTAAAACCTT
	GTCTTTTCTTTACTAAAGGTGACTTatTCTCACCATATTCGCTTC
	CCTCAACCTACCTCCAACaaTCAAACTCATTGGCTGCATCTGTAT
	TGTCTGATACACCAGGACAACTCTAatTCTCACCATATTCGCTTC
	CCTCAACCTACCTCCAACaaCGTTTGCTTGTCTTTTCCTTGGTGG
	CGTTTGTTGGTTGATTATTTGCATTatTCTCACCATATTCGCTTC
